# Supplementary material
Source: MDPI journal article supplement (https://www.mdpi.com/2073-4441/14/15/2416)
Supplement: s1 [file s1]

**Table S2: Parameters validation set**

| <b>ID</b> | <b>Bl</b> | <b>Slb</b> | <b>St</b> | <b>Slc</b> | <b>LB</b> | <b>Wc</b> | <b>Wr</b> | <b>Lr</b> | <b>Hr</b> | <b>vol</b> | <b>Hc</b> |
|-----------|-----------|------------|-----------|------------|-----------|-----------|-----------|-----------|-----------|------------|-----------|
| 1V        | 148       | 0.02       | 1.24      | 2.6        | 182.2     | 3.5       | 248.9     | 308.5     | 13.8      | 0.876      | 0.68      |
| 2V        | 318       | 0.68       | 1.09      | 9.3        | 221.3     | 6.4       | 125.6     | 233.4     | 7.1       | 0.169      | 1.06      |
| 3V        | 566       | 0.07       | 0.09      | 0.6        | 177.0     | 8.2       | 302.6     | 221       | 12.6      | 0.702      | 1         |
| 4V        | 717.6     | 0.44       | 1.93      | 5.2        | 499.6     | 6.2       | 64.8      | 401.2     | 14.0      | 0.284      | 1.95      |
| 5V        | -538      | 0.13       | 0.65      | 4.1        | 363.4     | 5.2       | 120.2     | 345.9     | 12.6      | 0.426      | 1.66      |
| 6V        | 172       | 0.85       | 1.02      | 6.6        | 238.8     | 6.5       | 297.3     | 246.9     | 9.6       | 0.585      | 1.13      |
| 7V        | -213      | 0.52       | 1.77      | 8.6        | 110.0     | 7.6       | 274.0     | 91.9      | 6.3       | 0.132      | 0.17      |
| 8V        | 138       | 0.81       | 0.69      | 1.9        | 160.2     | 5.5       | 209.2     | 256.3     | 11.4      | 0.504      | 1.18      |
| 9V        | -368      | 0.07       | 0.81      | 1.2        | 128.7     | 3.4       | 163.2     | 372.3     | 7.7       | 0.385      | 0.24      |
| 10V       | 656.8     | 0.07       | 1.21      | 7.2        | 217.3     | 9.6       | 196.3     | 502.8     | 6.1       | 0.493      | 0.59      |
| 11V       | 175       | 0.86       | 1.3       | 9.8        | 86.8      | 0         | 101.1     | 379       | 9.9       | 0.305      | 1.84      |
| 12V       | -352      | 0.41       | 0.56      | 8.0        | 240.0     | 0         | 273.6     | 71.6      | 10.2      | 0.166      | 0         |
| 13V       | -168      | 0.61       | 0.78      | 1.4        | 400.9     | 0         | 326.6     | 363       | 6.0       | 0.588      | 0         |
| 14V       | -199      | 0.35       | 1.89      | 2.8        | 30.7      | 0         | 227.2     | 193.7     | 14.7      | 0.536      | 0         |
| 15V       | 587.9     | 0.87       | 0.52      | 3.5        | 146.8     | 0         | 324.3     | 390.5     | 5.9       | 0.622      | 0         |
| 16V       | -665.6    | 0.82       | 1.45      | 5.8        | 438.6     | 0         | 178.7     | 294.9     | 12.1      | 0.526      | 0         |
| 17V       | -640      | 0.02       | 0.08      | 3.3        | 276.3     | 0         | 205.6     | 358.8     | 5.7       | 0.347      | 0         |
| 18V       | 199       | 0.33       | 1.96      | 4.7        | 373.0     | 0         | 242.5     | 165.6     | 10.6      | 0.353      | 0         |
| 19V       | -245      | 0.16       | 0.12      | 1.7        | 486.9     | 0         | 294.4     | 404.3     | 6.7       | 0.660      | 0         |
| 20V       | 77        | 0.53       | 0.26      | 9.6        | 81.8      | 0         | 63.2      | 139       | 9.2       | 0.063      | 0         |
