# Supplementary material
Source: MDPI journal article supplement (https://www.mdpi.com/2073-4441/14/15/2416)
Supplement: s1 [file s1]

**Table S1: Parameters test set**

| ID | Bl    | Slb  | St   | Slc  | LB    | Wc   | Wr     | Lr    | Hr    | vol   | Hc   |
|----|-------|------|------|------|-------|------|--------|-------|-------|-------|------|
| 5  | -540  | 0.55 | 0.86 | 9.79 | 65.91 | 6.95 | 269.48 | 334.8 | 5.93  | 0.443 | 1.60 |
| 6  | 122   | 0.01 | 1.85 | 8.21 | 36.92 | 3.84 | 251.0  | 355.5 | 5.03  | 0.371 | 1.71 |
| 9  | -14   | 0.45 | 1.61 | 9.72 | 152.6 | 8.4  | 94.1   | 303.4 | 12.8  | 0.293 | 1.43 |
| 35 | -172  | 0.34 | 1.35 | 4.05 | 508.9 | 8.9  | 221.9  | 241.3 | 7.58  | 0.335 | 1.1  |
| 36 | 284   | 0.8  | 0.85 | 0.2  | 100.5 | 5.6  | 53.6   | 326.0 | 15    | 0.201 | 1.55 |
| 37 | -350  | 0.83 | 1.29 | 8.6  | 138.1 | 6.4  | 224.1  | 132.1 | 10.32 | 0.253 | 1.77 |
| 38 | 621.5 | 0.63 | 1.1  | 3.23 | 376.9 | 3.1  | 256.9  | 98.2  | 8.34  | 0.174 | 0.34 |
| 55 | 510   | 0.78 | 1.41 | 4.2  | 430.2 | 2.1  | 226.5  | 158.7 | 6.7   | 0.199 | 0.66 |
| 60 | -285  | 0.66 | 0.63 | 1.55 | 27.1  | 1.4  | 297.6  | 68.8  | 10.78 | 0.184 | 0.19 |
| 61 | -234  | 0.75 | 0.06 | 1.32 | 445.9 | 4.7  | 262.5  | 83.0  | 10.37 | 0.188 | 1.53 |
| 62 | 612.8 | 0.1  | 1.61 | 6.02 | 422.3 | 8.7  | 274.4  | 131.9 | 5.42  | 0.163 | 2.03 |
| 63 | -277  | 0.46 | 0.24 | 4.42 | 212.6 | 1.8  | 57.5   | 264.0 | 8.36  | 0.098 | 1.22 |
| 64 | 302   | 0.35 | 0.9  | 0.52 | 356.3 | 7.2  | 109.4  | 272.9 | 8.13  | 0.196 | 1.27 |
| 65 | -206  | 0.57 | 1.31 | 9.63 | 265.6 | 6.8  | 294.4  | 99.2  | 9.99  | 0.243 | 0.35 |
| 66 | -418  | 0.65 | 0.15 | 3.02 | 44.1  | 8.1  | 115.5  | 310.1 | 14.77 | 0.428 | 1.47 |
| 67 | 291   | 0.98 | 1.56 | 7.44 | 260.2 | 2.8  | 162.3  | 262.8 | 11.81 | 0.413 | 1.22 |
| 68 | -471  | 0.43 | 0.78 | 8.7  | 394.6 | 3.5  | 70.2   | 130.5 | 6.19  | 0.045 | 0.51 |
| 69 | -72   | 0.61 | 1.76 | 7.73 | 317.0 | 1.8  | 170.6  | 68.3  | 9.44  | 0.090 | 0.18 |
| 75 | 555   | 0.25 | 1.86 | 5.79 | 363.5 | 3.0  | 152.3  | 238.3 | 14    | 0.416 | 1.09 |
| 76 | -603  | 0.12 | 1.36 | 0.59 | 407.2 | 3.2  | 74.6   | 316.4 | 8.64  | 0.161 | 1.5  |
| 77 | -242  | 0.16 | 0.65 | 9.85 | 86.5  | 7.9  | 203.9  | 301.7 | 5.84  | 0.296 | 1.42 |
| 78 | 171   | 0.35 | 0.53 | 1.1  | 350.5 | 7.4  | 58.5   | 180.9 | 14.04 | 0.115 | 0.78 |
| 79 | 184   | 0.24 | 0.29 | 2.8  | 323.0 | 5.1  | 297.0  | 288.9 | 5.61  | 0.400 | 1.36 |
| 80 | 683   | 0.18 | 1.44 | 8.37 | 258.8 | 3.7  | 145.5  | 312.2 | 12.48 | 0.463 | 1.48 |
| 81 | 490   | 0.08 | 1.29 | 1.2  | 272.6 | 3.7  | 240.2  | 221.6 | 8.16  | 0.360 | 1    |

|     |        |      |      |      |       |      |       |       |       |       |      |
|-----|--------|------|------|------|-------|------|-------|-------|-------|-------|------|
| 82  | -435   | 0.91 | 1.71 | 0.28 | 137.6 | 9.2  | 51.6  | 250.9 | 14.38 | 0.142 | 1.15 |
| 83  | -567   | 0.5  | 1.51 | 3.92 | 115.0 | 3.8  | 160.4 | 91.1  | 14.63 | 0.175 | 0.31 |
| 84  | 634    | 0.54 | 0.2  | 6.36 | 397.3 | 5.9  | 171.6 | 296.8 | 10.21 | 0.427 | 1.4  |
| 85  | -363   | 0.33 | 0.59 | 3.47 | 176.4 | 3.3  | 300.0 | 161.3 | 10.55 | 0.425 | 1.58 |
| 99  | 590    | 0.87 | 1.54 | 4.53 | 95.0  | 8.3  | 177.2 | 161.0 | 6.64  | 0.156 | 0.68 |
| 112 | 441    | 0.08 | 0.74 | 9.21 | 236.0 | 8.5  | 258.5 | 151.5 | 14.42 | 0.469 | 0.63 |
| 113 | 216    | 0.61 | 1.14 | 0.33 | 267.2 | 6.2  | 124.6 | 210.9 | 13.92 | 0.297 | 0.94 |
| 114 | -24    | 0.97 | 1.3  | 2.13 | 243.8 | 7.6  | 272.1 | 307.1 | 5.47  | 0.379 | 1.45 |
| 115 | 382    | 0.78 | 0.31 | 4.89 | 462.2 | 2.2  | 55.8  | 83.0  | 14.67 | 0.052 | 0.26 |
| 116 | -227   | 0.93 | 1.65 | 0.12 | 464.4 | 8.7  | 118.8 | 295.1 | 5.66  | 0.161 | 1.39 |
| 140 | 335    | 0.62 | 1.37 | 7.62 | 13.8  | 9.2  | 234.7 | 89.5  | 7.86  | 0.137 | 0.3  |
| 141 | -725.1 | 0.67 | 1.04 | 4.71 | 481.3 | 10.0 | 59.7  | 314.8 | 11.31 | 0.165 | 1.49 |
| 142 | 626.5  | 0.71 | 0.35 | 2.21 | 304.7 | 10.0 | 247.0 | 125.2 | 8.56  | 0.219 | 0.49 |
| 143 | -427   | 0.79 | 1.9  | 9.91 | 293.2 | 4.2  | 164.3 | 291.6 | 10.06 | 0.395 | 1.94 |
| 144 | -676.4 | 0.57 | 1.63 | 2.27 | 429.2 | 7.3  | 157.3 | 201.4 | 13    | 0.337 | 0.89 |
| 145 | 78     | 0.2  | 0.66 | 5.28 | 372.8 | 9.1  | 99.7  | 326.5 | 9.74  | 0.255 | 1.56 |
| 146 | -188   | 0.75 | 1.21 | 2.4  | 318.6 | 1.6  | 57.0  | 173.1 | 11    | 0.084 | 0.74 |
| 147 | 643    | 0.44 | 1.17 | 6.53 | 210.8 | 4.5  | 80.2  | 364.1 | 6.12  | 0.142 | 2.04 |
| 148 | -265   | 0.25 | 1.04 | 6.21 | 43.2  | 4.8  | 254.3 | 352.5 | 5.07  | 0.376 | 1.69 |
| 149 | 232    | 0.49 | 1.63 | 8.13 | 112.9 | 6.4  | 63.5  | 356.5 | 10.1  | 0.178 | 1.72 |
| 173 | 318    | 0.92 | 1.09 | 4.68 | 12.1  | 0.0  | 201.0 | 97.5  | 9.75  | 0.158 | 0    |
| 174 | -548   | 0.29 | 0.55 | 8.82 | 493.6 | 0.0  | 52.1  | 365.4 | 11.42 | 0.166 | 0    |
| 175 | 699    | 0.38 | 0.47 | 4.06 | 96.7  | 0.0  | 121.1 | 53.1  | 6.08  | 0.032 | 0    |
| 199 | 220    | 0.18 | 1.78 | 2.23 | 42.6  | 0.0  | 182.0 | 59.0  | 8.03  | 0.071 | 0    |
| 200 | 442    | 0.98 | 1.81 | 3.26 | 164.2 | 0.0  | 114.0 | 108.0 | 8     | 0.080 | 0    |
